# Supplementary material
Source: publisher figshare collection journal article supplement (https://asha.figshare.com/articles/dataset/_/16674355)
Supplement: Supplementary file 1 [file 1]

## Supplemental Material S1. Shared Interactive Book

### Reading Systematic Review Coding Manual

| Data to be Extracted                  | Definition                                                                                                                                                                                                            | Notes                                                                                          |
|---------------------------------------|-----------------------------------------------------------------------------------------------------------------------------------------------------------------------------------------------------------------------|------------------------------------------------------------------------------------------------|
| <b>Study Identification</b>           |                                                                                                                                                                                                                       |                                                                                                |
| Authors Names                         |                                                                                                                                                                                                                       |                                                                                                |
| Publication Date                      |                                                                                                                                                                                                                       |                                                                                                |
| Journal Name                          |                                                                                                                                                                                                                       |                                                                                                |
| Study Design                          | Group<br>Single Case                                                                                                                                                                                                  |                                                                                                |
| <b>Child Participant Demographics</b> |                                                                                                                                                                                                                       |                                                                                                |
| Number                                |                                                                                                                                                                                                                       |                                                                                                |
| Gender                                | F (Female)<br>M (Male)<br>NR (Not Reported)                                                                                                                                                                           |                                                                                                |
| Age Range                             | In months                                                                                                                                                                                                             |                                                                                                |
| Disability<br>Category/Diagnosis      | ASD (Autism Spectrum Disorder)<br>CP (Cerebral Palsy)<br>DD (Developmental Delay)<br>DS (Down Syndrome)<br>LD (Language<br>Delay/Disorder/Impairment)<br>TD (Typically Developing)                                    | If different<br>descriptors used for<br>language, please add<br>"Language Ability"<br>(below). |
| Language Ability                      | List how language ability was<br>quantified or described                                                                                                                                                              |                                                                                                |
| Intellectual Ability                  | NR (Not Reported)<br>WNL (Within Normal Limits)                                                                                                                                                                       | If no codes specified<br>were used, extract<br>exact data                                      |
| Race/Ethnicity                        | A (Asian American)<br>AA (African American)<br>B (Black)<br>C (Caucasian)<br>H (Hispanic)<br>I (American Indian)<br>L (Latino)<br>M (Multi-Racial)<br>NR (Not Reported)<br>O (Other)<br>W (White, White Non-Hispanic) | For reporting,<br>combined AA and B;<br>C and W                                                |
| Home Language                         | E (English)<br>BL (Bilingual)<br>NR (Not Reported)<br>O (Other)                                                                                                                                                       | If "Other", please<br>specify                                                                  |
| Socio-Economic Status<br>(SES)        | L (Low)<br>MC (Middle Class)                                                                                                                                                                                          | If no codes specified<br>were used, extract                                                    |

|                                                          |                                                                                                                                                                                                                       |                                                                           |
|----------------------------------------------------------|-----------------------------------------------------------------------------------------------------------------------------------------------------------------------------------------------------------------------|---------------------------------------------------------------------------|
|                                                          | UC (Upper Class)<br>NR (Not Reported)                                                                                                                                                                                 | exact data (e.g.,<br>income range).                                       |
| <b>Adult Participant Demographics</b>                    |                                                                                                                                                                                                                       |                                                                           |
| Number                                                   |                                                                                                                                                                                                                       |                                                                           |
| Description of Implementer                               | P (Parent)<br>R (Researcher)<br>SLP (Speech-Language Pathologist)<br>T (Teacher, Paraeducator)                                                                                                                        |                                                                           |
| Socio-Economic Status (SES)                              | L (Low)<br>MC (Middle Class)<br>UC (Upper Class)<br>NR (Not Reported)                                                                                                                                                 | If no codes specified were used, extract exact data (e.g., income range). |
| Age Range                                                | In years<br>NR (Not Reported)                                                                                                                                                                                         |                                                                           |
| Race/Ethnicity                                           | A (Asian American)<br>AA (African American)<br>B (Black)<br>C (Caucasian)<br>H (Hispanic)<br>I (American Indian)<br>L (Latino)<br>M (Multi-Racial)<br>NR (Not Reported)<br>O (Other)<br>W (White, White Non-Hispanic) | For reporting, combined AA and B; C and W                                 |
| <b>Adult Participant Dependent Measures</b>              |                                                                                                                                                                                                                       |                                                                           |
| Primary Dependent Variable (DV)                          | Write description from text<br>NA (Not Applicable)                                                                                                                                                                    | If no data was collected on adult implementation (NA)                     |
| Number or Percent of Sessions DVs were Measured/Reported | Exact percentage or number of sessions<br>NA (Not Applicable)                                                                                                                                                         | If no data was collected on adult implementation (NA)                     |
| Measurement System                                       | Describe how data was collected (e.g., video/audio recordings, checklists)<br>NA (Not Applicable)                                                                                                                     | If no data was collected on adult implementation (NA)                     |
| Brief Summary of Results                                 | Provide a statement summarizing adult DVs<br>NA (Not Applicable)                                                                                                                                                      | If no data was collected on adult implementation (NA)                     |
| <b>Child Participant Dependent Measures</b>              |                                                                                                                                                                                                                       |                                                                           |
| Primary Dependent Variable (DV)                          | Write description from text                                                                                                                                                                                           |                                                                           |
| Number or Percent of Sessions DVs were Measured/Reported | Exact percentage or number of sessions<br>NA (Not Applicable)                                                                                                                                                         |                                                                           |

|                                              |                                                                                                                 |                                                                                                         |
|----------------------------------------------|-----------------------------------------------------------------------------------------------------------------|---------------------------------------------------------------------------------------------------------|
| Measurement System (Language)                | Describe how data was collected (e.g., norm-referenced assessment, researcher tool, language sample)            |                                                                                                         |
| Brief Summary of Results                     | Provide a statement summarizing child DVs                                                                       |                                                                                                         |
| <b>Independent Variables</b>                 |                                                                                                                 |                                                                                                         |
| Independent Variable (IV)                    | Name of specific program used as described by author(s)                                                         |                                                                                                         |
| Training and/or Coaching for Interventionist | C (Coaching)<br>T (Training, Professional Development Session)                                                  | If no specified codes were used, extract exact description)                                             |
| Treatment Dosage                             | Total Number of Sessions<br>Frequency of Session (e.g., per week, month)<br>Duration of Sessions (if specified) |                                                                                                         |
| Intervention Arrangement                     | Ratio of adult to children during reading sessions                                                              | If not provided, specify small or large group as noted in article.                                      |
| Intervention Setting                         | C (Classroom)<br>H (Home)                                                                                       | If additional information about setting is provided, add a note.                                        |
| <b>Group Design Rigor</b>                    |                                                                                                                 |                                                                                                         |
| Evidence of Random Assignment                | N (No)<br>Y (Yes)                                                                                               | study participants are assigned randomly to form two or more groups.                                    |
| Sample Attrition <30%                        | N (No)<br>Y (Yes)                                                                                               | Reported attrition must be below 30%.                                                                   |
| Sample Comparability                         | N (No)<br>Y (Yes)                                                                                               | Is there sufficient information and data to compare both the intervention and business-as-usual groups? |
| IV and Comparison Described                  | N (No)<br>Y (Yes)                                                                                               | Did the authors describe the independent variable and comparison done between groups?                   |
| Multiple Outcome Measures                    | N (No)<br>Y (Yes)                                                                                               | Were the outcomes evaluated with at least two measures?                                                 |

|                                              |                   |                                                                                                                                                               |
|----------------------------------------------|-------------------|---------------------------------------------------------------------------------------------------------------------------------------------------------------|
| Reliability of Outcome Measures              | N (No)<br>Y (Yes) | Are the outcome measures realizable?<br>Are the reliability of the tools used reported?                                                                       |
| Validity of Outcome Measures                 | N (No)<br>Y (Yes) | Are the outcome measures valid? Are the validity of the tools used reported?                                                                                  |
| Fidelity of IV Reported                      | N (No)<br>Y (Yes) | Did the authors conduct the treatment/intervention with fidelity and report the fidelity?                                                                     |
| Effect Size Reported                         | N (No)<br>Y (Yes) | Did the authors report effect sizes?                                                                                                                          |
| Baseline Equivalence                         | N (No)<br>Y (Yes) | Is baseline equivalence reported?                                                                                                                             |
| Meets Design Standards (Without Reservation) | N (No)<br>Y (Yes) | If the groups were randomly assigned, had low attrition with no concerns of confounding factors or concerns with outcomes.                                    |
| Meets Design Standard (With Reservations)    | N (No)<br>Y (Yes) | If the groups were not randomly assigned or had high attrition with no concerns of confounding factors or concerns with outcomes.                             |
| <b>Single Case Experimental Design Rigor</b> |                   |                                                                                                                                                               |
| Manipulation of IV                           | N (No)<br>Y (Yes) | Is the IV systematically manipulated over time? For example, in “multiple-baseline” or “alternating treatment” designs, the IV is manipulated multiple times. |
| DV Measured Repeatedly                       | N (No)<br>Y (Yes) | Is the DV measured over time? If the IV is manipulated multiple times, then the DV                                                                            |

|                                                           |                   |                                                                                                                                                                      |
|-----------------------------------------------------------|-------------------|----------------------------------------------------------------------------------------------------------------------------------------------------------------------|
|                                                           |                   | must be measured repeatedly.                                                                                                                                         |
| Inter-Observer Agreement (IOA) Reported for $\geq 20\%$   | N (No)<br>Y (Yes) | Did the authors report IOA for at least 20% or more?                                                                                                                 |
| Reported IOA at $\geq 80\%$                               | N (No)<br>Y (Yes) | Is the IOA reported for more than 80%?                                                                                                                               |
| At Least Three Attempts in Demonstrating Treatment Effect | N (No)<br>Y (Yes) | Did the study design allow for at least three attempts in demonstrating treatment design? For example, “multiple baseline” design can allow at least three attempts. |
| At Least Three Data Points Per Phase                      | N (No)<br>Y (Yes) | Did the authors collect at least three data points in each phase? (baseline, intervention, maintenance).                                                             |
| Residual Treatment for Alternating Treatment Design       | N (No)<br>Y (Yes) | Did the authors use alternating treatment design? If so, did the authors report residual treatment?                                                                  |
| Meets Design Standards (Without Reservations)             | N (No)<br>Y (Yes) | if they provided five or more data points per condition and met all other design standard criteria.                                                                  |
| Meets Design Standards (With Reservations)                | N (No)<br>Y (Yes) | If there were three or four data points per condition and met all other standard criteria.                                                                           |
